# Supplementary material for: Mitochondrial complex I structure reveals ordered water molecules for catalysis and proton translocation
Source: Springer Nature journal article supplement (doi:10.1038/s41594-020-0473-x), 2020-08-03
Supplement: 41594_2020_473_MOESM1_ESM.pdf [file 41594_2020_473_MOESM1_ESM.pdf]

In the format provided by the authors and unedited.

# Mitochondrial complex I structure reveals ordered water molecules for catalysis and proton translocation

Daniel N. Grba  and Judy Hirst  

---

The Medical Research Council Mitochondrial Biology Unit, University of Cambridge, Cambridge, UK. ✉e-mail: [jh@mrc-mbu.cam.ac.uk](mailto:jh@mrc-mbu.cam.ac.uk)

**Supplementary Table 1. Build summary of subunits in our *Y. lipolytica* complex I model and the homologous subunits of *M. musculus* (PDB 6G2J)<sup>20</sup>**

| Subunit | Human/<br>bovine<br>nomenclature | Chain                 | Total residues<br>(mature<br>protein<br>numbering) | Residues<br>modelled [%]<br>(range built) | Mammalian<br>homology<br>reference | Residues<br>without side<br>chains | Modelled<br>with side<br>chains [%] |
|---------|----------------------------------|-----------------------|----------------------------------------------------|-------------------------------------------|------------------------------------|------------------------------------|-------------------------------------|
| NUAM    | NDUFS1/<br>75 kDa                | G                     | 694<br>(35–728)                                    | 100<br>(35–728)                           | <sup>11</sup>                      | 0                                  | 100                                 |
| NUBM    | NDUFV1/<br>51 kDa                | F                     | 470<br>(19–488)                                    | 98<br>(29–488)                            | <sup>11</sup>                      | 0                                  | 100                                 |
| NUCM    | NDUFS2/<br>49 kDa                | D                     | 444<br>(23–466)                                    | 98<br>(30–466)                            | <sup>11</sup>                      | 0                                  | 100                                 |
| NUGM    | NDUFS3/<br>30 kDa                | C                     | 263 <sup>a</sup><br>(31–281)                       | 92<br>(33–274)                            | <sup>11</sup>                      | 0                                  | 100                                 |
| NUHM    | NDUFV2/<br>24 kDa                | E                     | 216<br>(28–243)                                    | 100<br>(28–243)                           | <sup>11</sup>                      | 0                                  | 100                                 |
| NUIM    | NDUFS8/<br>TYKY                  | I                     | 198<br>(32–229)                                    | 96<br>(39–229)                            | <sup>11</sup>                      | 0                                  | 100                                 |
| NUKM    | NDUFS7/<br>PSST                  | B                     | 183<br>(28–210)                                    | 97<br>(34–210)                            | <sup>11</sup>                      | 0                                  | 100                                 |
| NU1M    | NU1M/<br>ND1                     | H                     | 341<br>(1–341)                                     | 100<br>(1–341)                            | <sup>11</sup>                      | 215–217                            | 99                                  |
| NU2M    | NU2M/<br>ND2                     | N                     | 469<br>(1–469)                                     | 100<br>(1–469)                            | <sup>11</sup>                      | 0                                  | 100                                 |
| NU3M    | NU3M/<br>ND3                     | A                     | 128<br>(1–128)                                     | 100<br>(1–128)                            | <sup>11</sup>                      | 38, 42–46                          | 95                                  |
| NU4M    | NU4M/<br>ND4                     | M                     | 486<br>(1–486)                                     | 100<br>(1–486)                            | <sup>11</sup>                      | 0                                  | 100                                 |
| NU5M    | NU5M/<br>ND5                     | L                     | 655<br>(1–655)                                     | 100<br>(1–655)                            | <sup>11</sup>                      | 609–612                            | 99                                  |
| NU6M    | NU6M/<br>ND6                     | J                     | 185<br>(1–185)                                     | 100<br>(1–185)                            | <sup>11</sup>                      | 0                                  | 100                                 |
| NULM    | NULM/<br>ND4L                    | K                     | 89<br>(1–89)                                       | 100<br>(1–89)                             | <sup>11</sup>                      | 0                                  | 100                                 |
| NUEM    | NDUFA9/<br>39 kDa                | P                     | 355<br>(21–375)                                    | 100<br>(21–375)                           | <sup>11</sup>                      | 353–364                            | 97                                  |
| NUFM    | NDUFA5/<br>B13                   | V                     | 136<br>(9–144)                                     | 93<br>(19–144)                            | <sup>11</sup>                      | 0                                  | 100                                 |
| NUMM    | NDUFS6/<br>13 kDa                | R                     | 118<br>(19–136)                                    | 100<br>(19–136)                           | <sup>11</sup>                      | 0                                  | 100                                 |
| NUYM    | NDUFS4/<br>18 kDa/AQDQ           | Q                     | 137<br>(25–161)                                    | 91<br>(37–161)                            | <sup>11</sup>                      | 0                                  | 100                                 |
| NUZM    | NDUFA7/<br>B14.5a                | c, r<br>( <i>Mm</i> ) | 182<br>(1–182)                                     | 100<br>(1–182)                            | <sup>12</sup>                      | 0                                  | 100                                 |
| N7BM    | NDUFA12/<br>B17.2                | f, q<br>( <i>Mm</i> ) | 137<br>(2–138)                                     | 100<br>(2–138)                            | <sup>11</sup>                      | 0                                  | 100                                 |
| NB4M    | NDUFA6/<br>B14                   | W                     | 123<br>(2–124)                                     | 100<br>(2–124)                            | <sup>11</sup>                      | 0                                  | 100                                 |
| ACPM1   | NDUFAB1/<br>SDAP                 | T                     | 84<br>(26–109)                                     | 96<br>(29–109)                            | <sup>11</sup>                      | 0                                  | 100                                 |
| NI8M    | NDUFA2/<br>B8                    | S                     | 86<br>(2–87)                                       | 100<br>(2–87)                             | <sup>11</sup>                      | 0                                  | 100                                 |
| NUPM    | NDUFA8/<br>PGIV                  | X                     | 171<br>(2–172)                                     | 100<br>(2–172)                            | <sup>11</sup>                      | 0                                  | 100                                 |
| NUJM    | NDUFA11/<br>B14.7                | Y                     | 185<br>(14–198)                                    | 97<br>(20–198)                            | <sup>11</sup>                      | 0                                  | 100                                 |
| NB6M    | NDUFA13/<br>B16.6                | Z                     | 122<br>(2–123)                                     | 100<br>(2–123)                            | <sup>11</sup>                      | 0                                  | 100                                 |
| NIPM    | NDUFS5/<br>15 kDa/PFFD           | e                     | 88<br>(2–89)                                       | 77<br>(2–69)                              | <sup>11</sup>                      | 0                                  | 100                                 |
| NUXM    | Absent from<br><i>Mm</i>         | O                     | 168<br>(2–169)                                     | 100<br>(2–169)                            | <sup>11</sup>                      | 0                                  | 100                                 |

|       |                          |                    |                                                         |                               |                                                       |                                                                                                                |     |
|-------|--------------------------|--------------------|---------------------------------------------------------|-------------------------------|-------------------------------------------------------|----------------------------------------------------------------------------------------------------------------|-----|
| NI9M  | NDUFA3/<br>B9            | b                  | 78<br>(1–78)                                            | 100<br>(1–78)                 | <sup>11</sup>                                         | 0                                                                                                              | 100 |
| NIMM  | NDUFA1/<br>MWFE          | a                  | 86<br>(2–87)                                            | 100<br>(2–87)                 | <sup>11</sup>                                         | 0                                                                                                              | 100 |
| NEBM  | NDUFC2/<br>B14.5b        | d                  | 73<br>(2–74)                                            | 92<br>(2–68)                  | Structural<br>homologue <sup>c</sup><br><sub>35</sub> | 0                                                                                                              | 0   |
| ST1   | Absent from<br><i>Mm</i> | q<br>(PDB<br>6YJ5) | 314<br>(2–315)                                          | 97<br>(2–307)                 | <sup>11</sup>                                         | 30–36, 45,<br>54–67, 139,<br>144–149,<br>169–192,<br>197, 200–<br>225, 234–<br>236–244,<br>246–254,<br>292–307 | 63  |
| NESM  | NDUFB11/<br>ESSS         | g                  | 204<br>(46–249)                                         | 97<br>(46–243)                | <sup>11</sup>                                         | 75–85                                                                                                          | 94  |
| NIAM  | NDUFB8/<br>ASHI          | l                  | 125<br>(25–149)                                         | 100<br>(25–149)               | <sup>11</sup>                                         | 0                                                                                                              | 100 |
| NUNM  | NDUFB5/<br>SGDH          | h                  | 119<br>(32–150)                                         | 95<br>(38–150)                | Structural<br>homologue <sup>c</sup><br><sub>35</sub> | 0                                                                                                              | 100 |
| NB2M  | NDUFB3/<br>B12           | k                  | 59<br>(2–60)                                            | 80<br>(2–48)                  | <sup>11</sup>                                         | 0                                                                                                              | 100 |
| NB5M  | NDUFB4/<br>B15           | m                  | 92<br>(2–93)                                            | 100<br>(2–93)                 | <sup>11</sup>                                         | 0                                                                                                              | 100 |
| NB8M  | NDUFB7/<br>B18           | o                  | 98<br>(2–98)                                            | 85<br>(2–84)                  | <sup>11</sup>                                         | 0                                                                                                              | 100 |
| ACPM2 | NDUFAB1/<br>SDAP         | U                  | 88<br>(45–132)                                          | 100<br>(45–132)               | <sup>11</sup>                                         | 0                                                                                                              | 100 |
| NIDM  | NDUFB10/<br>PDSW         | p                  | 91<br>(2–92)                                            | 100<br>(2–92)                 | <sup>11</sup>                                         | 0                                                                                                              | 100 |
| NI2M  | NDUFB9/<br>B22           | n                  | 108<br>(2–109)                                          | 100<br>(2–109)                | <sup>11</sup>                                         | 0                                                                                                              | 100 |
| NIGM  | NDUFB2/<br>AGGG          | j                  | 91 <sup>b</sup><br>(31–83)<br>67 <sup>c</sup><br>(1–67) | 58<br>(31–83)<br>79<br>(7–59) | Structural<br>homologue <sup>d</sup><br><sub>19</sub> | 0                                                                                                              | 100 |
| NUUM  | NDUFB6/<br>B17           | i                  | 89<br>(2–90)                                            | 97<br>(2–87)                  | Same<br>position in<br>structure <sup>e</sup>         | 0                                                                                                              | 100 |
|       | NDUFV3/10<br>kDa         | s ( <i>Mm</i> )    |                                                         |                               | Absent from<br><i>Yl</i>                              |                                                                                                                |     |
|       | NDUFA10/42<br>kDa        | O<br>( <i>Mm</i> ) |                                                         |                               | Absent from<br><i>Yl</i>                              |                                                                                                                |     |
|       | NDUFC1/<br>KFYI          | c ( <i>Mm</i> )    |                                                         |                               | Absent from<br><i>Yl</i>                              |                                                                                                                |     |
|       | NDUFB1/<br>MNLL          | f ( <i>Mm</i> )    |                                                         |                               | Absent from<br><i>Yl</i>                              |                                                                                                                |     |

<sup>a</sup>Includes the hexa-Ala-hexa-His tag; <sup>b</sup>Includes the MTS predicted by MitoFates<sup>64</sup>; <sup>c</sup>The mature protein predicted by Parey and coworkers,<sup>19</sup> as used in the final model; <sup>d</sup>Little sequence homology but excellent secondary structure overlap; <sup>e</sup>Little sequence homology and some secondary structure overlap (situated at equivalent site in model). MTS-cleavage sites were assumed from previously published information<sup>62,63</sup>.

**Supplementary Table 2. Reference table for the numbering of the water molecules used in this manuscript, relative to the system used in the model (PDB 6YJ4).**

| Manuscript water number | Numbering in 6YJ4 | Nearest Subunit | Subunit Chain |
|-------------------------|-------------------|-----------------|---------------|
| 1                       | 612               | NDUFS2          | D             |
| 2                       | 614               | NDUFS2          | D             |
| 3                       | 605               | NDUFS2          | D             |
| 4                       | 602               | NDUFS2          | D             |
| 5                       | 407               | NDUFS7          | B             |
| 6                       | 413               | NDUFS7          | B             |
| 7                       | 401               | NDUFS7          | B             |
| 8                       | 705               | ND1             | H             |
| 9                       | 408               | NDUFS7          | B             |
| 10                      | 706               | ND1             | H             |
| 11                      | 704               | ND1             | H             |
| 12                      | 405               | NDUFS7          | B             |
| 13                      | 710               | ND1             | H             |
| 14                      | 202               | ND6             | J             |
| 15                      | 602               | ND3             | A             |
| 16                      | 103               | ND4L            | K             |
| 17                      | 2514              | ND2             | N             |
| 18                      | 102               | ND4L            | K             |
| 19                      | 2511              | ND2             | N             |
| 20                      | 2513              | ND2             | N             |
| 21                      | 2501              | ND2             | N             |
| 22                      | 2515              | ND2             | N             |
| 23                      | 2507              | ND2             | N             |
| 24                      | 2535              | ND2             | N             |
| 25                      | 2526              | ND2             | N             |
| 26                      | 2536              | ND2             | N             |
| 27                      | 2523              | ND2             | N             |
| 28                      | 2527              | ND2             | N             |
| 29                      | 2537              | ND2             | N             |
| 30                      | 2512              | ND2             | N             |
| 31                      | 608               | ND4             | M             |
| 32                      | 612               | ND4             | M             |
| 33                      | 603               | ND4             | M             |
| 34                      | 610               | ND4             | M             |
| 35                      | 604               | ND4             | M             |
| 36                      | 606               | ND4             | M             |
| 37                      | 602               | ND4             | M             |
| 38                      | 1125              | ND5             | L             |
| 39                      | 1106              | ND5             | L             |
| 40                      | 1116              | ND5             | L             |
| 41                      | 1102              | ND5             | L             |
| 42                      | 1123              | ND5             | L             |
| 43                      | 1115              | ND5             | L             |

**Supplementary Table 3. Comparison of the  $\pi$  bulges detected in structures of complex I from different species**

|     | $\pi$ bulge          | <i>M. musculus</i> (active) | <i>M. musculus</i> (deactive)   | <i>H. sapiens</i>    | <i>S. scrofa</i>   | <i>Y. lipolytica</i> | <i>E. coli</i>     | <i>T. thermophilus</i> | <i>T. elongatus</i> |
|-----|----------------------|-----------------------------|---------------------------------|----------------------|--------------------|----------------------|--------------------|------------------------|---------------------|
|     |                      | 6G2J <sup>20</sup>          | 6G72 <sup>20</sup>              | 5XTC <sup>44</sup>   | 5GPN <sup>45</sup> | 6YJ4                 | 3RKO <sup>28</sup> | 4HEA <sup>26</sup>     | 6NBQ <sup>46</sup>  |
| ND1 | $\pi$ 1              | 289–295                     | 288–293<br>288–292              | 287–293<br>286–293   | 288–293            | 311–315              | n/a                |                        | 344–350             |
|     | $\pi$ 2              |                             |                                 |                      |                    | 204–208              | n/a                |                        |                     |
|     | $\pi$ 3              |                             |                                 |                      |                    |                      | n/a                | 189–193                |                     |
|     | $\pi$ 4              |                             |                                 |                      |                    |                      | n/a                | 211–215                |                     |
|     | $\pi$ 5              |                             |                                 |                      |                    |                      | n/a                | 276–280                |                     |
| ND2 | $\pi$ 1              |                             |                                 | 129–133              |                    |                      | 242–249            | 211–215                |                     |
|     | $\pi$ 2              | 298–302                     |                                 |                      |                    |                      |                    |                        |                     |
|     | $\pi$ 3              |                             | 325–335                         |                      |                    |                      |                    |                        |                     |
|     | $\pi$ 4              |                             |                                 |                      |                    |                      |                    |                        | 261–267             |
|     | $\pi$ 5              |                             |                                 |                      |                    |                      |                    |                        | 286–292             |
|     | $\pi$ 6              |                             |                                 |                      |                    |                      |                    |                        | 430–434             |
| ND4 | $\pi$ 1              |                             |                                 | 231–235              |                    | 246–250              | 259–263            |                        | 250–254             |
|     | $\pi$ 2              |                             |                                 |                      |                    |                      | 271–275<br>272–277 | 241–245                | 264–270             |
|     | $\pi$ 3              | 132–136                     | 132–136                         |                      |                    |                      |                    |                        |                     |
| ND5 | $\pi$ 1              | 245–251<br>247–251          | 245–251<br>246–251              | 244–251 <sup>b</sup> | 244–251            | 248–252<br>250–254   | 254–258<br>252–257 | 239–245                | 264–274<br>269–274  |
|     | $\pi$ 2              | 560–565<br>560–565          | 546–560 <sup>1</sup><br>560–564 | 560–564              |                    | 561–566<br>561–566   | 547–553<br>546–550 |                        | 614–618             |
|     | $\pi$ 3              | 546–552<br>553–557          | 546–560 <sup>a</sup><br>550–557 | 546–557<br>548–554   |                    | 576–582<br>574–583   |                    |                        |                     |
|     | $\pi$ 4 <sup>c</sup> | 427–431                     | 427–431<br>426–430              | 428–432              |                    | 434–438              |                    |                        |                     |
|     | $\pi$ 5              | 362–366                     |                                 |                      |                    |                      |                    |                        |                     |
|     | $\pi$ 6              | 484–488                     |                                 |                      |                    |                      |                    |                        |                     |
|     | $\pi$ 7              |                             |                                 |                      |                    |                      |                    |                        | 491–495             |
|     | $\pi$ 8              |                             |                                 | 389–393              |                    |                      |                    |                        |                     |
| ND6 | $\pi$ 1              |                             | 56–63<br>59–63                  | 57–63                | 56–61              | 60–68<br>59–67       | 58–63              | 63–70<br>55–63         | 61–68<br>63–70      |
|     | $\pi$ 2              |                             |                                 |                      |                    | 154–158<br>153–157   |                    |                        |                     |

Black: results from ASSP program<sup>74</sup>; red: results from DSSP<sup>75</sup>. Shaded rows contain  $\pi$  bulges that were detected in more than one organism. <sup>a</sup>Region containing multiple  $\pi$  bulges. <sup>b</sup> $\pi$  bulge not detected in the published model, but revealed following local remodelling using Coot. <sup>c</sup>On the periphery of the subunit so unlikely to be functionally relevant.

**Supplementary Table 4. The structural elements representing decreasing activation levels in the active mouse, ubiquinone-bound *Y. lipolytica*, DDM-bound *Y. lipolytica*, and deactive mouse complex I models**

|                                                            | <b>Active mouse<br/>PDB 6G2J<sup>20</sup></b> | <b>Ubiquinone-bound<br/><i>Y. lipolytica</i><br/>PDB 6RFR<sup>19</sup></b> | <b>DDM-bound<br/><i>Y. lipolytica</i><br/>PDB 6YJ4</b>                       | <b>Deactive mouse<br/>PDB 6G72<sup>20</sup></b>     |
|------------------------------------------------------------|-----------------------------------------------|----------------------------------------------------------------------------|------------------------------------------------------------------------------|-----------------------------------------------------|
|                                                            | <b>Active</b>                                 | <b>Active/deactive<br/>hybrid</b>                                          | <b>Mild deactive</b>                                                         | <b>Deactive</b>                                     |
| <b>ND1-TMH4</b>                                            | bent                                          | straight                                                                   | straight                                                                     | straight                                            |
| <b>ND1-TMH5–6 loop</b>                                     | ordered                                       | ordered but shifted compared to 6G2J                                       | shifted and partially disordered (residues 215–217 no side chain features)   | disordered (residues 204–215 absent from the model) |
| <b>ND1 cavity</b>                                          | relatively small and closed to matrix         | expanded due to TMH4 movement but not matrix exposed                       | expanded due to TMH4 movement and matrix exposed                             | expanded due to TMH4 movement and matrix exposed    |
| <b>ND3-TMH2–3 loop</b>                                     | ordered                                       | ordered                                                                    | shifted and partially disordered (residues 38, 42–46 no side chain features) | disordered (residues 28–48 absent from the model)   |
| <b>ND3-Cys40(<i>Mm</i>39)-binding pocket</b>               | present                                       | destabilised due to straightening of ND1-TMH4                              | absent                                                                       | absent                                              |
| <b>ND6-TMH3 <math>\pi</math> bulge</b>                     | absent                                        | present                                                                    | present                                                                      | present                                             |
| <b>NDUFS2-<math>\beta</math>1–<math>\beta</math>2 loop</b> | ordered                                       | ordered                                                                    | flexible (resolved but to a lower resolution than its surroundings)          | disordered (residues 52–60 absent from the model)   |
