# Supplementary material for: Mitochondrial complex I structure reveals ordered water molecules for catalysis and proton translocation
Source: Springer Nature journal article supplement (doi:10.1038/s41594-020-0473-x), 2020-08-03
Supplement: 41594_2020_473_MOESM2_ESM.pdf [file 41594_2020_473_MOESM2_ESM.pdf]

## Reporting Summary

Nature Research wishes to improve the reproducibility of the work that we publish. This form provides structure for consistency and transparency in reporting. For further information on Nature Research policies, see [Authors & Referees](#) and the [Editorial Policy Checklist](#).

### Statistics

For all statistical analyses, confirm that the following items are present in the figure legend, table legend, main text, or Methods section.

- |     |           |
|-----|-----------|
| n/a | Confirmed |
|-----|-----------|
- The exact sample size ( $n$ ) for each experimental group/condition, given as a discrete number and unit of measurement
  - A statement on whether measurements were taken from distinct samples or whether the same sample was measured repeatedly
  - The statistical test(s) used AND whether they are one- or two-sided  
*Only common tests should be described solely by name; describe more complex techniques in the Methods section.*
  - A description of all covariates tested
  - A description of any assumptions or corrections, such as tests of normality and adjustment for multiple comparisons
  - A full description of the statistical parameters including central tendency (e.g. means) or other basic estimates (e.g. regression coefficient) AND variation (e.g. standard deviation) or associated estimates of uncertainty (e.g. confidence intervals)
  - For null hypothesis testing, the test statistic (e.g.  $F$ ,  $t$ ,  $r$ ) with confidence intervals, effect sizes, degrees of freedom and  $P$  value noted  
*Give  $P$  values as exact values whenever suitable.*
  - For Bayesian analysis, information on the choice of priors and Markov chain Monte Carlo settings
  - For hierarchical and complex designs, identification of the appropriate level for tests and full reporting of outcomes
  - Estimates of effect sizes (e.g. Cohen's  $d$ , Pearson's  $r$ ), indicating how they were calculated

*Our web collection on [statistics for biologists](#) contains articles on many of the points above.*

### Software and code

Policy information about [availability of computer code](#)

Data collection

EPU 1.9 software on FEI Titan Krios

Data analysis

RELION 2.1patchb1, RELION 3.0, RELION 3.1, MotionCor2, GCTF 1.06, UCSF Chimera 1.13.1, UCSF ChimeraX 0.91, Coot 0.8.9.12, Coot 0.9, ISOLDE, Phenix 1.14, Phenix 1.16, MolProbity 4.4, EMRinger, Pymol 2.4, Scipion 1.2.1, MonoRes, LocalDeblur, SWISS-MODEL, CastP, CASTpyMOL 3.1, ASSP

For manuscripts utilizing custom algorithms or software that are central to the research but not yet described in published literature, software must be made available to editors/reviewers. We strongly encourage code deposition in a community repository (e.g. GitHub). See the Nature Research [guidelines for submitting code & software](#) for further information.

### Data

Policy information about [availability of data](#)

All manuscripts must include a [data availability statement](#). This statement should provide the following information, where applicable:

- Accession codes, unique identifiers, or web links for publicly available datasets
- A list of figures that have associated raw data
- A description of any restrictions on data availability

The electron microscopy maps and masks and the models for the global complex I and sub-stoichiometric sulfur transferase have been deposited in the Electron Microscopy Data Bank (EMDB) with accession numbers EMD-10815 (global) and EMD-10816 (ST1), and in the Protein Data Bank with accession codes 6YJ4 (global) and 6YJ5 (ST1).

## Field-specific reporting

Please select the one below that is the best fit for your research. If you are not sure, read the appropriate sections before making your selection.

Life sciences       Behavioural & social sciences       Ecological, evolutionary & environmental sciences

For a reference copy of the document with all sections, see [nature.com/documents/nr-reporting-summary-flat.pdf](https://www.nature.com/documents/nr-reporting-summary-flat.pdf)

## Life sciences study design

All studies must disclose on these points even when the disclosure is negative.

|                 |                                                                                                                                    |
|-----------------|------------------------------------------------------------------------------------------------------------------------------------|
| Sample size     | <input type="text" value="The number of cryo-EM particles in the single dataset collected was the number of particles available"/> |
| Data exclusions | <input type="text" value="Particles that were not complex I were excluded during analysis"/>                                       |
| Replication     | <input type="text" value="The final model is the average of thousands of individual particles"/>                                   |
| Randomization   | <input type="text" value="Not applicable"/>                                                                                        |
| Blinding        | <input type="text" value="Not applicable"/>                                                                                        |

## Reporting for specific materials, systems and methods

We require information from authors about some types of materials, experimental systems and methods used in many studies. Here, indicate whether each material, system or method listed is relevant to your study. If you are not sure if a list item applies to your research, read the appropriate section before selecting a response.

### Materials & experimental systems

| n/a                                 | Involved in the study                                           |
|-------------------------------------|-----------------------------------------------------------------|
| <input checked="" type="checkbox"/> | <input type="checkbox"/> Antibodies                             |
| <input checked="" type="checkbox"/> | <input type="checkbox"/> Eukaryotic cell lines                  |
| <input checked="" type="checkbox"/> | <input type="checkbox"/> Palaeontology                          |
| <input type="checkbox"/>            | <input checked="" type="checkbox"/> Animals and other organisms |
| <input checked="" type="checkbox"/> | <input type="checkbox"/> Human research participants            |
| <input checked="" type="checkbox"/> | <input type="checkbox"/> Clinical data                          |

### Methods

| n/a                                 | Involved in the study                           |
|-------------------------------------|-------------------------------------------------|
| <input checked="" type="checkbox"/> | <input type="checkbox"/> ChIP-seq               |
| <input checked="" type="checkbox"/> | <input type="checkbox"/> Flow cytometry         |
| <input checked="" type="checkbox"/> | <input type="checkbox"/> MRI-based neuroimaging |

## Animals and other organisms

Policy information about [studies involving animals](#); [ARRIVE guidelines](#) recommended for reporting animal research

|                         |                                                                                 |
|-------------------------|---------------------------------------------------------------------------------|
| Laboratory animals      | <input type="text" value="Yarrowia lipolytica GB10 with His-tagged complex I"/> |
| Wild animals            | <input type="text" value="Not applicable"/>                                     |
| Field-collected samples | <input type="text" value="Not applicable"/>                                     |
| Ethics oversight        | <input type="text" value="No ethical approval required for yeast work"/>        |

Note that full information on the approval of the study protocol must also be provided in the manuscript.
